# Supplementary material for: Strong emission of 2,4,6-triphenylpyridine-functionalized polytyrosine and hydrogen-bonding interactions with poly(4-vinylpyridine)
Source: Royal Society of Chemistry journal article supplement (doi:10.1039/c5py00938c), 2015-01-01
Supplement: c5py00938c1.pdf [file c5py00938c1.pdf]

## Supporting Information for

### Strong Emission of 2,4,6-Triphenylpyridine-Functionalized Polytyrosine and Hydrogen-Bonding Interactions with Poly(4-vinylpyridine)

Mohamed Gamal Mohamed,<sup>a</sup> Fang-Hsien Lu,<sup>a</sup> Jin-Long Hong<sup>a</sup> and Shiao-Wei Kuo<sup>a,b,c\*</sup>

<sup>a</sup>Department of Materials and Optoelectronic Science, National Sun Yat-Sen University, Kaohsiung, Taiwan.

<sup>b</sup>Department of Medicinal and Applied Chemistry, Kaohsiung Medical University, Kaohsiung, Taiwan.

<sup>c</sup>School of Chemical Engineering, East China University of Science and Technology, Shanghai, China

\*To whom correspondence should be addressed

E-mail: kuosw@faculty.nsysu.edu.tw

TEL./FAX: 886-7-5254099

Table S1: The emission property of Pyridine-NH<sub>2</sub> and Pyridine-PTyr

| Sample                   | Solvent  | $\lambda_{\max}$ (abs) | $\lambda_{\max}$ (PL) | $\Phi_f$ (%) |
|--------------------------|----------|------------------------|-----------------------|--------------|
| Pyridine-NH <sub>2</sub> | Methanol | 290                    | 494                   | 3.93         |
|                          | DCM      | 292                    | 430, 481              | 35.36        |
|                          | THF      | 303                    | 442, 482              | 35.71        |
|                          | DMF      | 310                    | 497                   | 46.50        |
|                          | Acetone  | 333                    | 497                   | 2.00         |
| Pyridine-PTyr            | Methanol | 263                    | 519                   | 2.19         |
|                          | DMF      | 277                    | 496                   | 25.23        |
|                          | DMSO     | 277                    | 505                   | 23.65        |

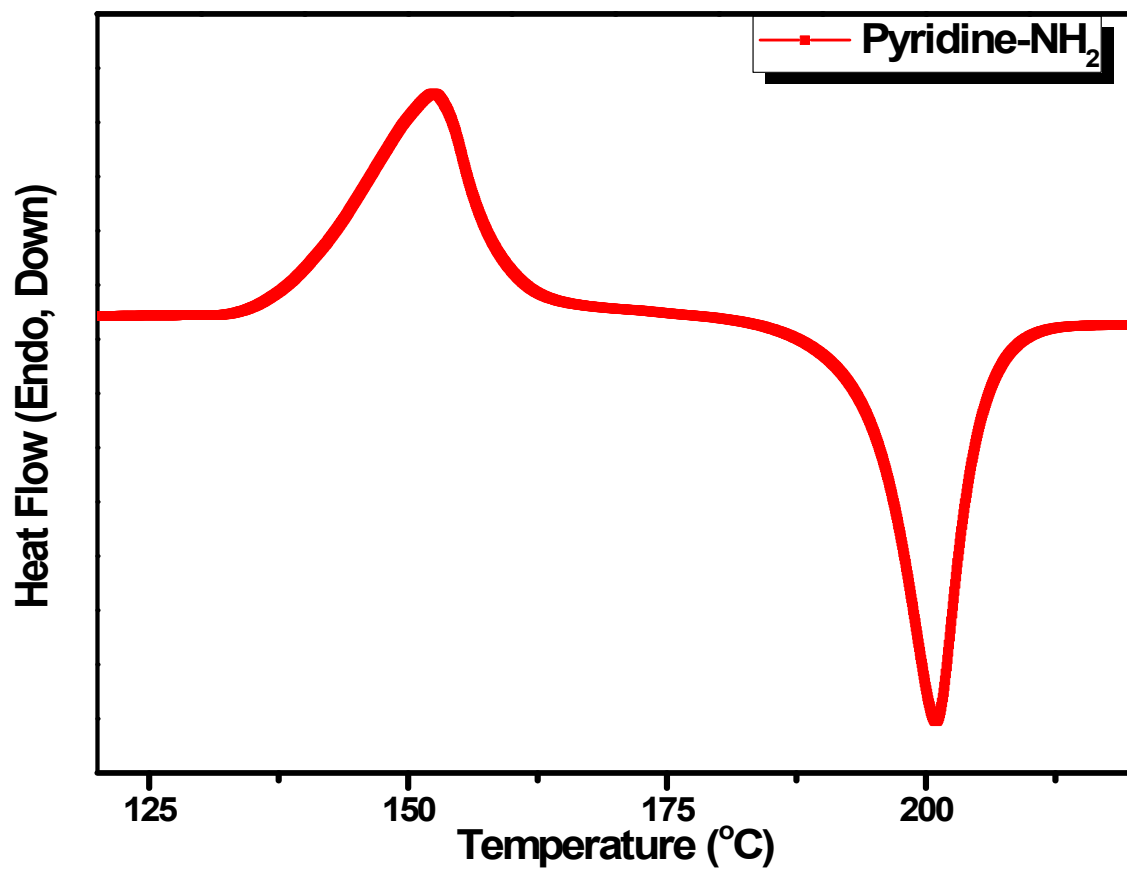

Figure S1: DSC thermogram of Pyridine-NH<sub>2</sub>

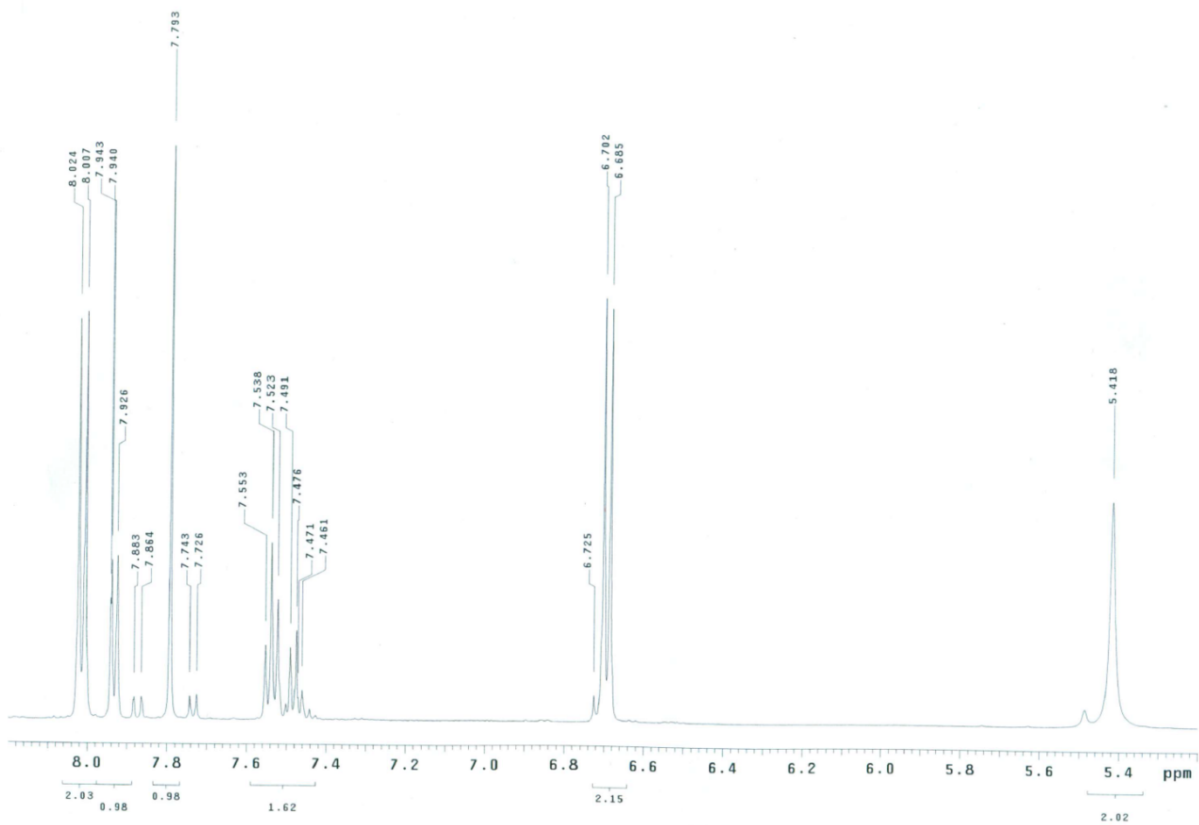

Figure S2:  $^1\text{H}$  NMR coupling constant spectra of Pyridine- $\text{NH}_2$  at room temperature

## Mass Spectrum SmartFormula Report

### Analysis Info

Analysis Name D:\Data\c7\pyridinneh2\_000004.d  
Method broadband first signal  
Sample Name pyridine-NH2  
Comment ESI Positive

6/26/2015 2:13:36 PM

Instrument: FT-MS solariX

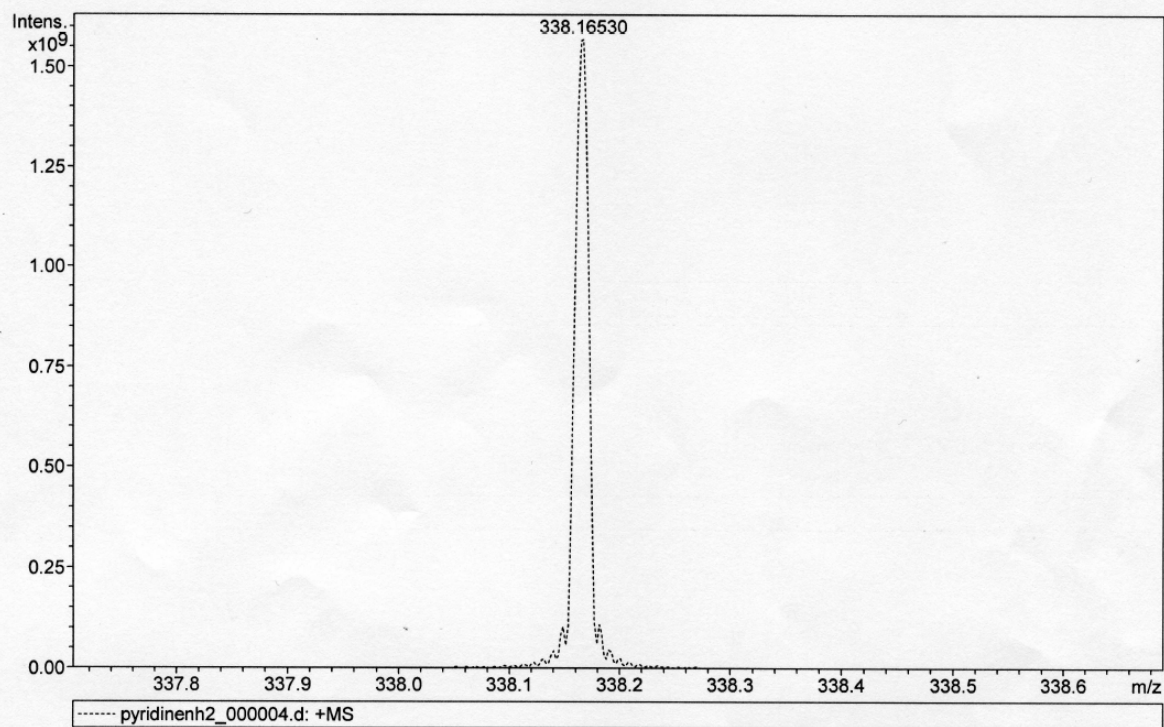

Figure S3: High resolution FT-MS of Pyridine-NH<sub>2</sub>

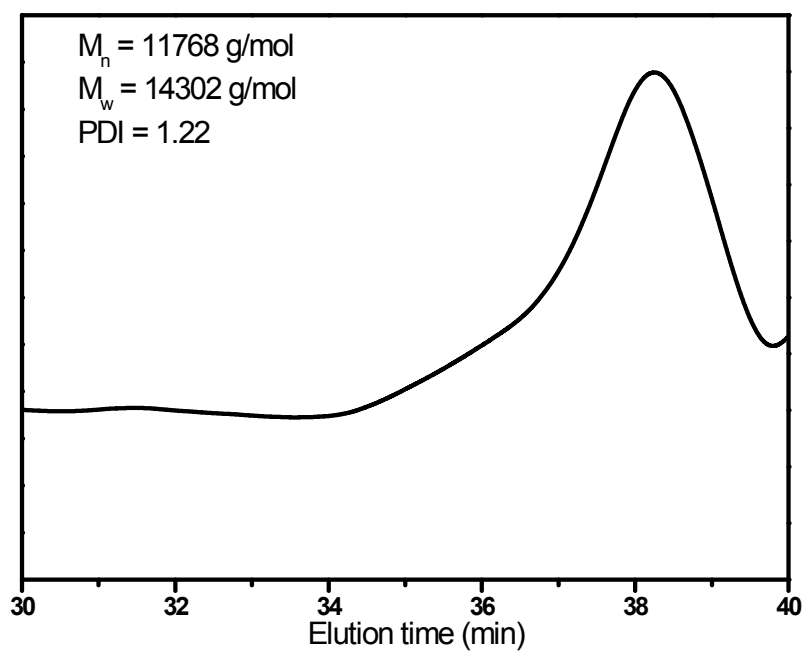

Figure S4: GPC profile of Pyridine-PTyr in DMF solution

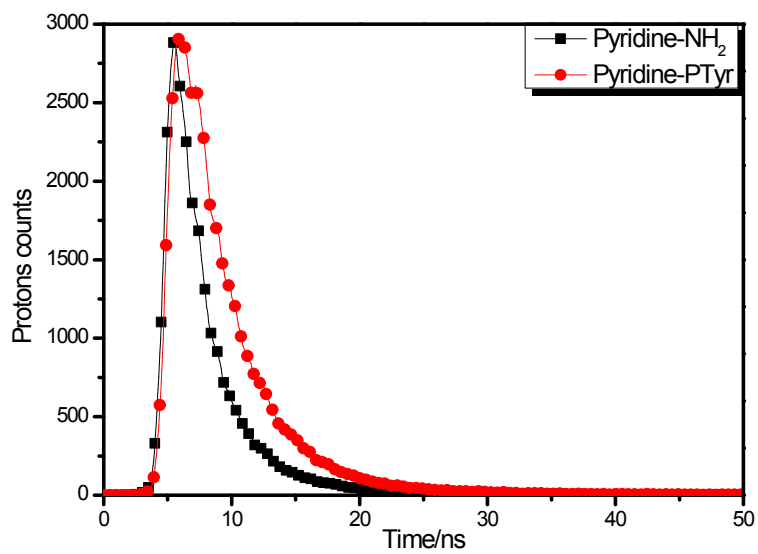

Figure S5: Fluorescence lifetime of Pyridine-NH<sub>2</sub> and Pyridine-PTyr in solid state with excitation wavelength 350 nm

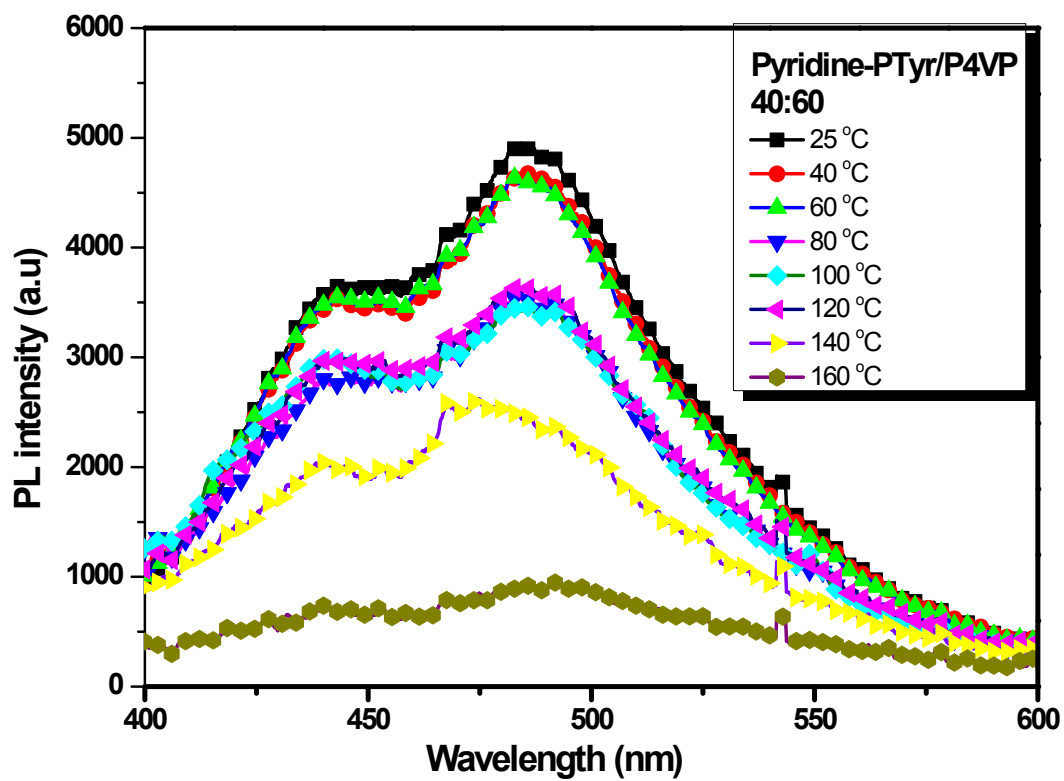

Figure S6: PL emission spectra of thin film of Pyridine-PTyr/P4VP (40/60) blend at different temperatures (excited 350 nm).
